# Supplementary material for: Identification and Economic Potentiality of Mineral Sands Resources of Hatiya Island, Bangladesh
Source: MDPI journal article supplement (doi:10.3390/min12111436), 2022-11-12
Supplement: s1 [file s1]

# Supplementary Material: Identification and Economic Potentiality of Mineral Sands Resources of Hatiya Island, Bangladesh

Md. Ripaj Uddin \*, Mayeen Uddin Khandaker \*, Nahida Akter, Md. Farid Ahmed, Syed Md. Minhaz Hossain, Abdul Gafur, Md. Jainal Abedin, Md. Aminur Rahman and Abubakr M. Idris

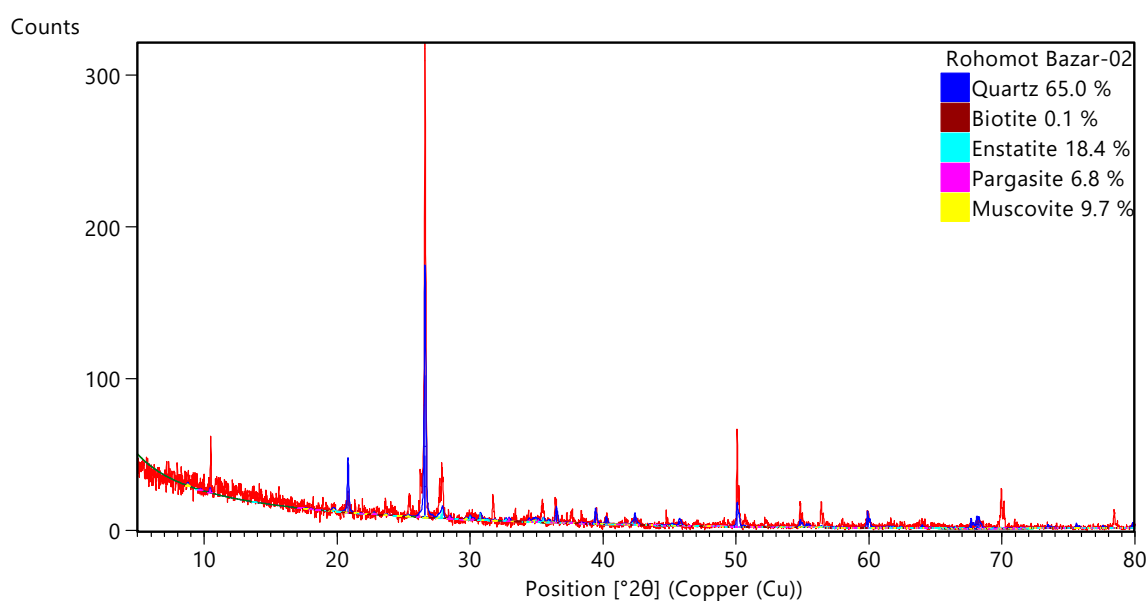

(a)

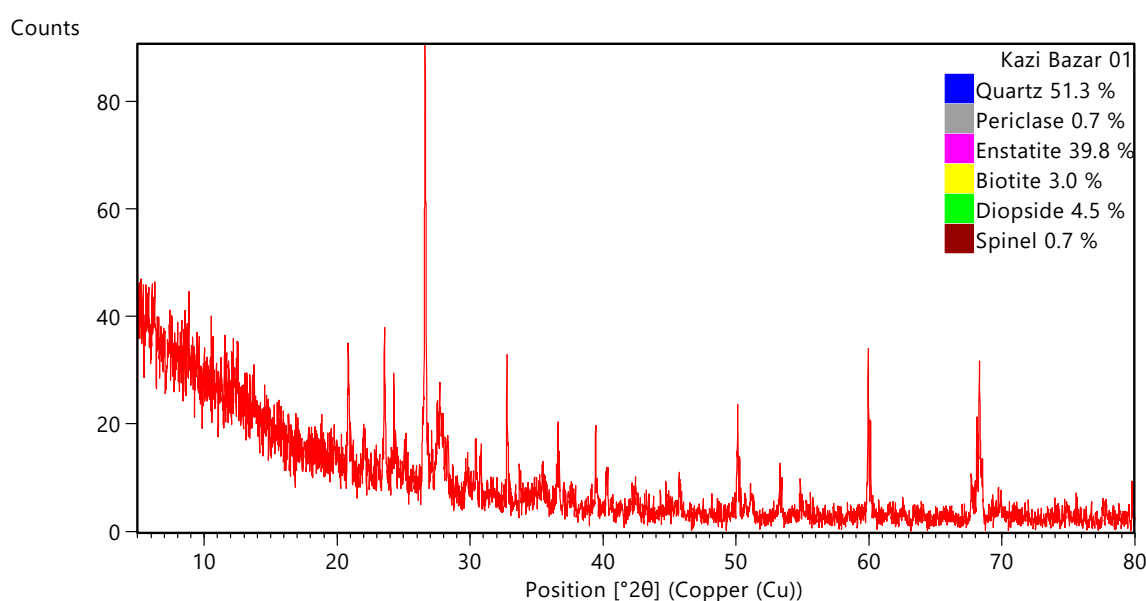

(b)

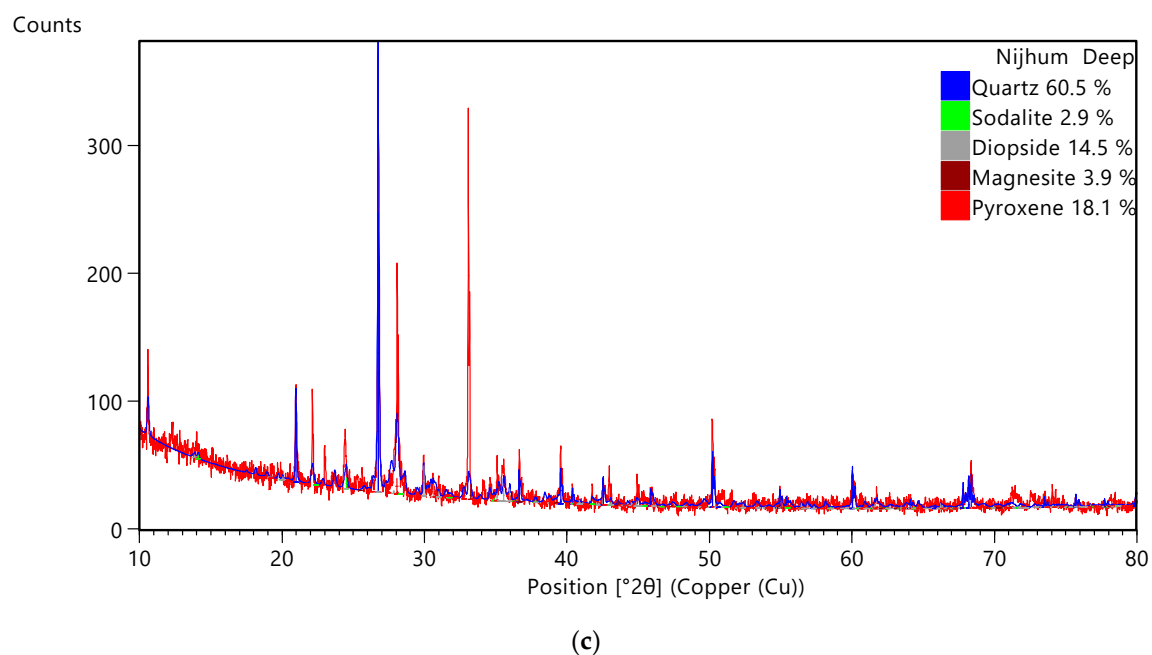

**Figure S1.** (a) XRD pattern for the magnetic component of Rohomat Bazar's sand. (b) XRD pattern for the magnetic component of Kazir Bazar's sand. (c) XRD Pattern for the magnetic component of Nijumdwip's sand.
